# Supplementary material for: An estimate of the deepest branches of the tree of life from ancient vertically evolving genes
Source: eLife journal article supplement (doi:10.7554/elife.66695), 2022-02-09

Between-domain split score

$10^2$   
 $10^{1.5}$   
 $10^1$   
 $10^{0.5}$   
 $10^0$

0

2000

4000

6000

$\Delta LL$

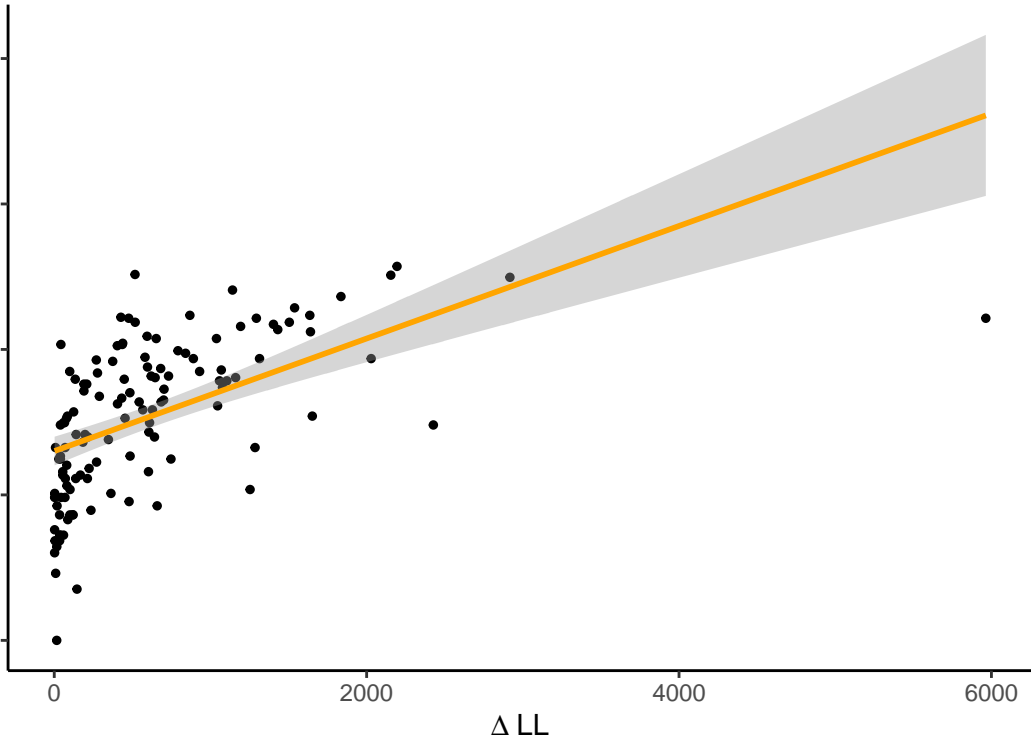

Supplement: supp [file elife_poa_e66695_Figure_1_figure_supplement_4.pdf › elife_poa_e66695_Figure_1_figure_supplement_4.pdf]
