# Supplementary material for: An estimate of the deepest branches of the tree of life from ancient vertically evolving genes
Source: eLife journal article supplement (doi:10.7554/elife.66695), 2022-02-09

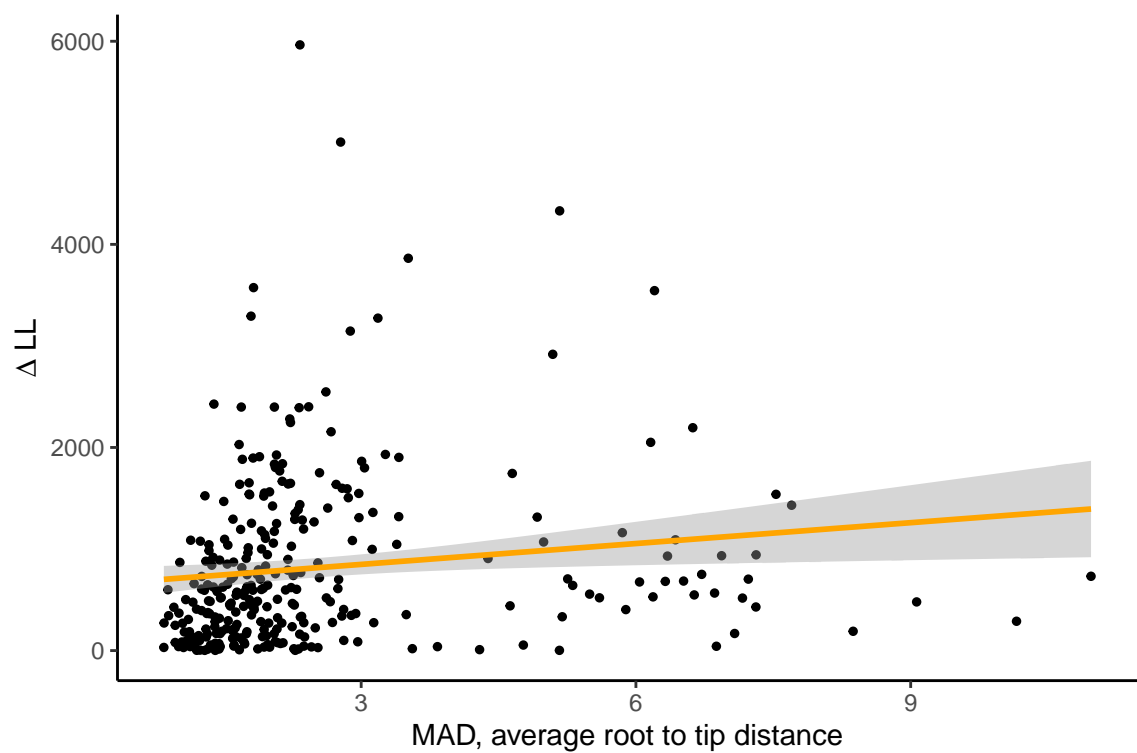

Supplement: supp [file elife_poa_e66695_Figure_1_figure_supplement_5.pdf › elife_poa_e66695_Figure_1_figure_supplement_5.pdf]
