# Supplementary material for: An estimate of the deepest branches of the tree of life from ancient vertically evolving genes
Source: eLife journal article supplement (doi:10.7554/elife.66695), 2022-02-09
Supplement: supp [file elife_poa_e66695_Figure_3_figure_supplement_2.pdf › elife_poa_e66695_Figure_3_figure_supplement_2.pdf]

Expanded,  
381 gene set

Slow

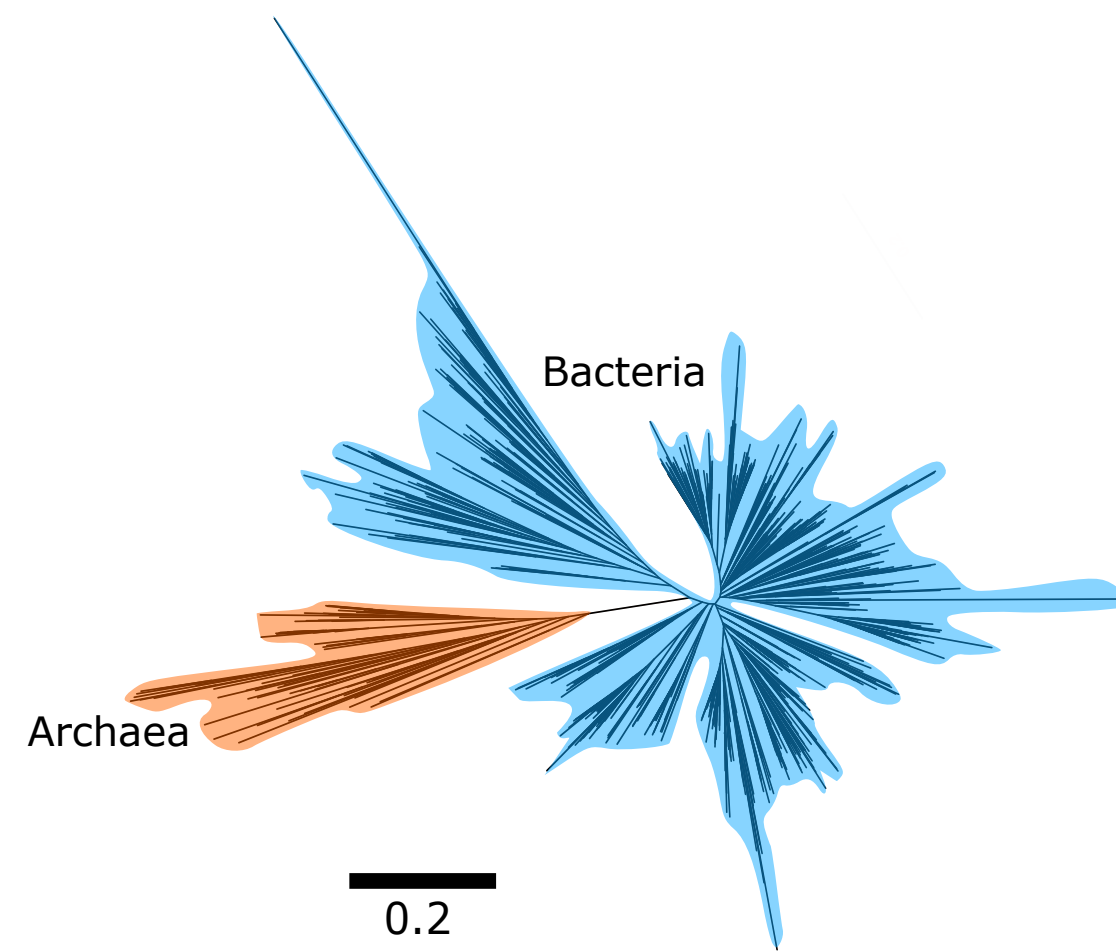

A

Fast

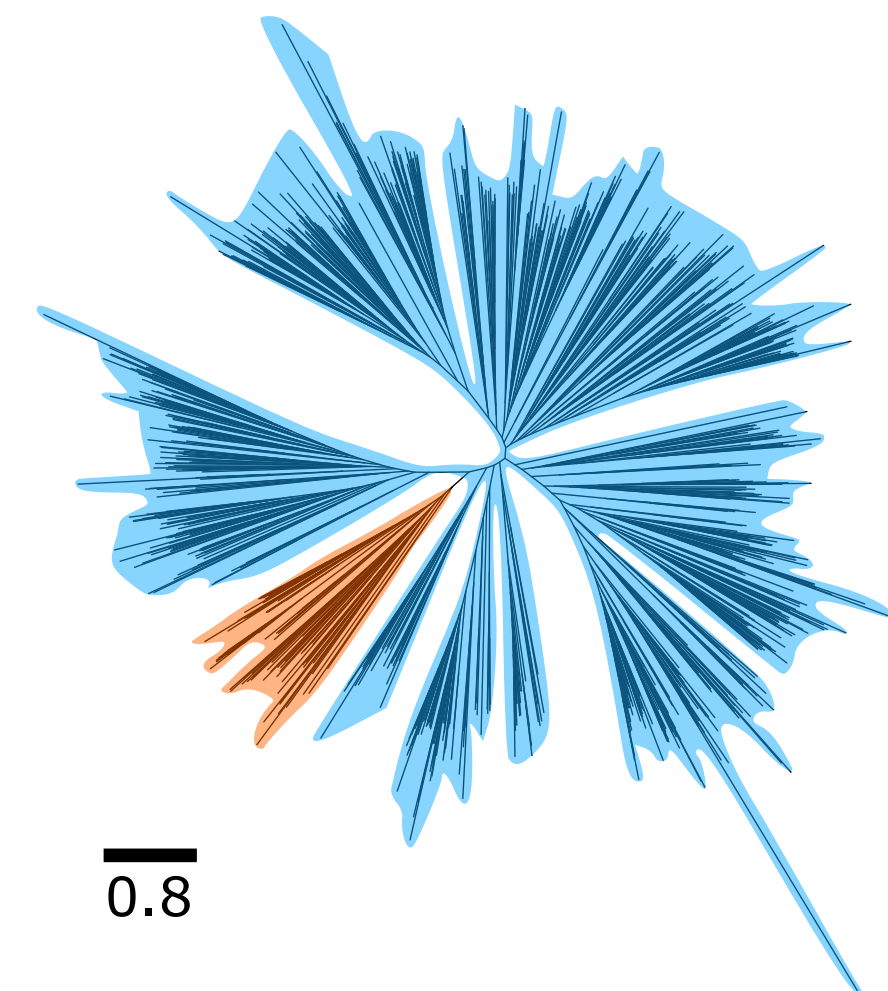

B

Expanded,  
Top 5%

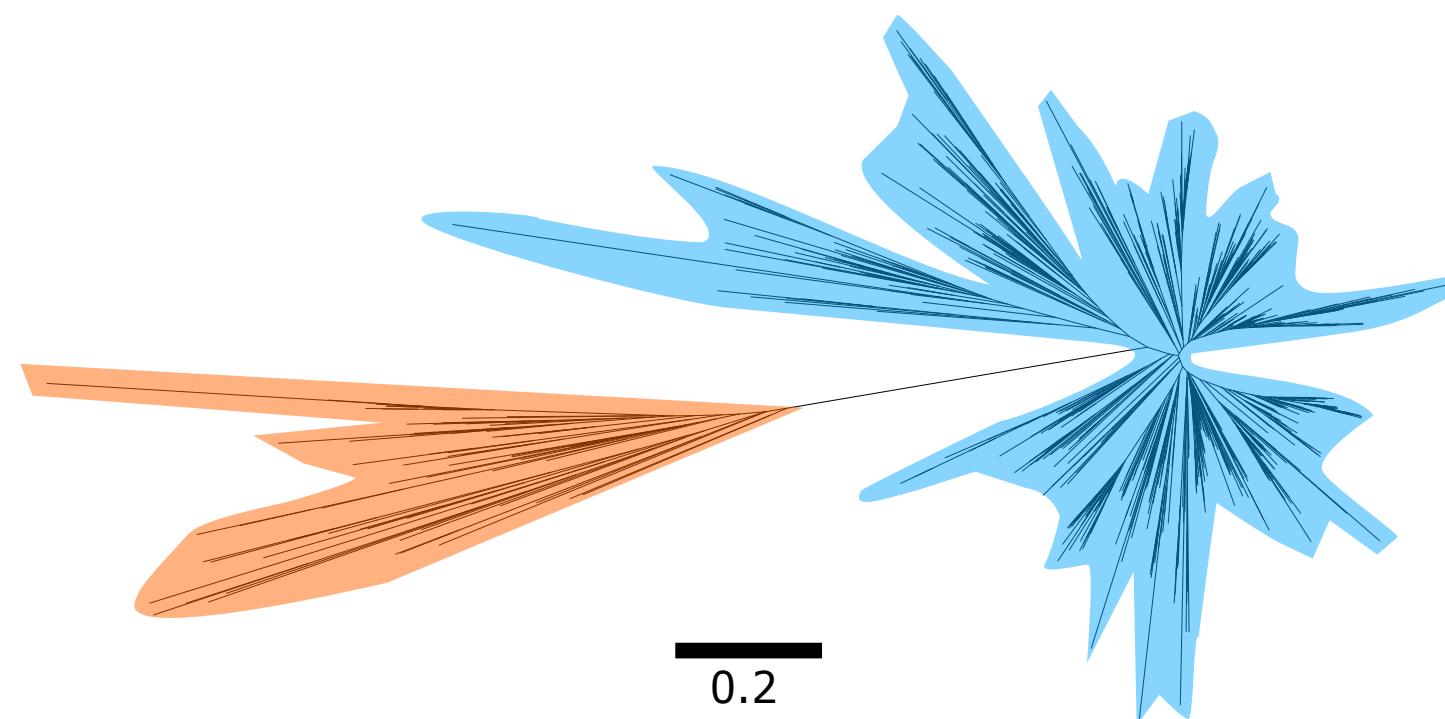

C

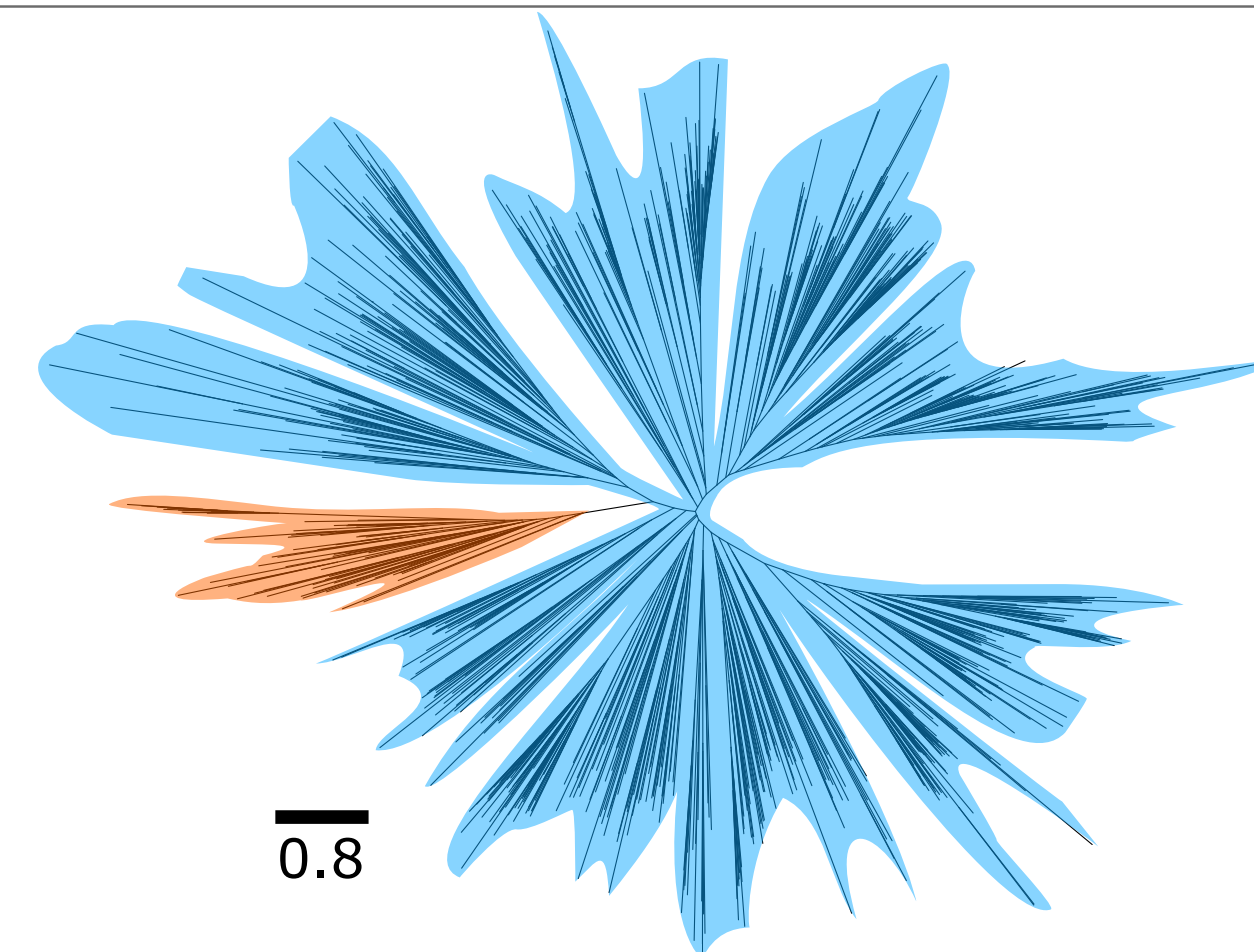

D
